# Supplementary material for: Position Validation of the Dwarfing Gene Dw6 in Oat (Avena sativa L.) and Its Correlated Effects on Agronomic Traits
Source: Front Plant Sci. 2021 May 20;12:668847. doi: 10.3389/fpls.2021.668847 (PMC8172587; doi:10.3389/fpls.2021.668847)
Supplement: Supplementary file 7 [file Table_3.XLSX]

## Sheet: Sheet1
Table S3. Primer information for microsatellite markers used in this study
Chromosome		Name	SSR motif	Start (bp)	End (bp)	Product size	Forward primer (5'-3')	Reverse primer (5'-3')
6D	1	SSR1	(AT)7	243707262	243707528	266	TTTTGGATTTTTGCAGTGGA	TGCTAGAAAGGCAATGGTTCT
6D	2	SSR2	(AAC)6	243724786	243724972	186	CAACAACAACATCACCCCTG	GAACTTTGCTGGCCTCAGTC
6D	3	SSR3	(GAT)6	243748831	243748937	106	ATTGTTACAGCGGGATGGAG	CCATCAACACCATCGTCAAG
6D	4	SSR4	(TGA)5	243799576	243799719	143	GATGACTTCCTGGAGGACCA	ATGGGACCGGATACAACTCA
6D	5	SSR5	(TTA)5	243858560	243858830	270	CGCTGAAGATGGAGCTTTTC	CCATGTTCATCCCCAAGTTC
6D	6	SSR6	(C)11	243860147	243860423	276	AGAGCTTTAGATCCCCCTCG	GGGACAAAAGCCAAAGTCAA
6D	7	SSR7	(AT)8	243875035	243875309	274	CCTGGCCTTGTGTAACCACT	AAGACTTGCATGGAATTTTGC
6D	11	SSR11	(AT)7	243921276	243921496	220	TGTTAGTGATTGGTTAGTGTGTATGTG	GAGGGTAGAGGAGGTCAGGG
6D	13	SSR13	(AAG)5	243942827	243943039	212	AGGCGATCAAGGGGTAGACT	ACTTGAAGACGAGTGGTGCC
6D	14	SSR14	(GAT)5	243945749	243945971	222	TCCAATGGTTCCACTCACAA	GGGAATTCCTTCCCAGAGAG
6D	15	SSR15	(TC)15	243977503	243977694	191	CCCCCACTCCTTAAACCCTA	GTCTCCTCCTTCCTTGGTCC
6D	16	SSR16	(TC)6	243984448	243984687	239	CCCCCTATATAAGGAGGGCA	CTCCGAGAGATGCACACGTA
6D	17	SSR17	(GCG)5	243987649	243987866	217	AGTCCATCTCTCCCTCCTCC	TTAAACGAAGGGGCAGTACG
6D	19	SSR19	(CT)7	244006097	244006364	267	TTGGCCTTTAACAGCTCTGG	ACAGTTCAATGGCTGGATCA				100
6D	21	SSR21	(TC)6	244015940	244016126	186	CATCCCTCTCTCCTCACCCT	AGAGCAGACAGGAGGAGGTC
6D	22	SSR22	(TTTTCT)5	244051754	244051959	205	AGAGAGAGAGGGCGAGGAAT	TCACTGCAAAAATCCAAAAGAA
6D	24	SSR24	(TC)9(TA)6	244108812	244108968	156	TTGCTTCATTTATGCCCACA	AGAGAACTGCCCCCACTCTT
6D	26	SSR26	(TCA)5	244131949	244132187	238	AAAATTTCTGCCAGGGGAAT	TCGAATGGTTCCACTCACAA
6D	28	SSR28	(AT)6	244170559	244170716	157	CGATACCGACGATCGAATCT	TAATCAATAGCGGGGTCTGG
6D	29	SSR29	(TC)8	244171195	244171433	238	ATATATAGAGGGCAGGGGCG	CTCCGAGAGATGCACACGTA
6D	30	SSR30	(CTT)13	244184003	244184159	156	TCGGCTTCGTCTTCTTCTTC	AGTAAAAGCCTCGAGCGTCA
6D	31	SSR31	(CTT)12	244196436	244196689	253	AGCCCCAAAGTCAATCCTTT	AAAACGAAGCACTCCTCGAA
6D	33	SSR33	(TC)6	244245102	244245366	264	CCCATGATGAGGAGGGAGTA	ACACGTGGGGAAAAGCATAG
6D	34	SSR34	(AAG)5	244287404	244287640	236	GAAGATGGTGAGAGATGGGG	CAGTGGGAGTTGGAATGACA
6D	35	SSR35	(CTT)6	244355497	244355714	217	AAGGAGGGCTAGAGCTAGGG	TGAGGAATCCAGAGTGGGAG
6D	36	SSR36	(CTT)5	244358356	244358584	228	ATCACGCGGAAAATTACAGG	TTCGTCTCCACTCCCATTTC
6D	37	SSR37	(GAC)5	244360619	244360736	117	AGTGGTGTTTGGTTTCCAGC	CTTTGGCTGCTCCTCTTCC
6D	38	SSR38	(T)10attgtttcacccgg(GT)9	244363110	244363374	264	AGTGCCACAGTGTGCTCAAC	GTCTCTCTGCTGGTTACGGC
6D	41	SSR41	(AG)6	244424066	244424273	207	TAGACGCGCGAGTGAGAGTA	CCCTGGCCTCCACAATACTA
6D	42	SSR42	(CTT)13	244426086	244426291	205	TGGCAAGGTTGAGTTCTTCA	CAGAAGCTTTCCCACCTTTG
6D	43	SSR43	(GTT)5	244430126	244430394	268	GATGAAGGACCCCATGCTTA	CCAAAAAGATGACTTCCCCA
6D	44	SSR44	(GTT)12	244440168	244440447	279	CCTTGGGAAGGGTTATCTCC	TAATCCCAATCCAACCCAAA
6D	45	SSR45	(CAA)5	244469596	244469731	135	GCTGCACCTGGAAATAGCTC	CCTACCGCACTCGAATCCTA
6D	46	SSR46	(AT)7	244508041	244508320	279	TGTCCCAGGACAACCATTTT	GGAAGTCGGTTAGGCTCAAG
6D	48	SSR48	(GCC)5	244566429	244566555	126	GGAACAAGCCGCTTCAACTA	GTGCCGAACCTGAAGAACTC
6D	49	SSR49	(TC)7	244574211	244574371	160	TCACTTTGCAAGATGTGGGA	GGTGAAGAACTCCTTGCTCG
6D	50	SSR50	(CT)8	244597371	244597644	273	TCCTGAAATGTGATCGTTGC	TGCTCAGCGAAATAAGCAGA
6D	51	SSR51	(CT)8	244610932	244611205	273	TCCTGAAATGTGATCGTTGC	TGCTCAGCGAAATAAGCAGA
6D	52	SSR52	(ATC)6	244619565	244619757	192	CCATCAACACCATCGTCAAG	TCCAATGGTTCCACTCACAA
6D	53	SSR53	(CTT)7	244641508	244641623	115	TCGGCTTCGTCTTCTTCTTC	TGACGATGACGAACTTCCTG
6D	54	SSR54	(GCC)5	244680111	244680320	209	CATAAGTAGAGGGGGAGGGG	ATGGTGGATTAGGGTTTCCC
6D	61	SSR61	(GA)6	244755107	244755385	278	CAATTCGGTAGCTACTTTGCC	TAAAGAGGTGGGGTCAGTGG
6D	63	SSR63	(GA)6	244761038	244761316	278	CAATTCGGTAGCTACTTTGCC	TAAAGAGGTGGGGTCAGTGG
6D	65	SSR65	(GTG)5	244772080	244772246	166	AATCTTTTGGGTGTGGCAAG	ATAATTTGCACCCCTTGTGC
6D	66	SSR66	(TGG)5	244773551	244773704	153	CAAGGTGAGGAAGCCTGAAG	GTGGAGGCGCAAGAGAAGTA
6D	69	SSR69	(TC)6	244779720	244779936	216	ACCACCATCTCCATCATCGT	TGCACGCTGTCACTTACACA
6D	70	SSR70	(TC)6	244798030	244798293	263	CCCATGATGAGGAGGGAGTA	CACGTGGGGAAAGCATAGAT
6D	72	SSR72	(AGG)5	244816614	244816885	271	ACCTCTGCCGTCATCTTTGT	CTGCTACCCTGATCCCATGT
6D	74	SSR74	(CA)6	244817712	244817880	168	TGGTACGTTGTTACCTGGCA	AGCTAGCACGACGATCCATT
6D	75	SSR75	(AT)7	244831957	244832178	221	CTAGGTATGACGGTGCCGAT	TAAGTGTTTGACCCTTCGGG
6D	78	SSR78	(ACG)5	244849491	244849614	123	GTGTTGATTCGCCTCTTGGT	GCAGTTTTATAGGCGGTGGA
6D	79	SSR79	(GA)6	244849928	244850157	229	CTGCCTCCAGTTTCATGTCA	TGTGGAGTTGGTGCTAGTGC
6D	81	SSR81	(AT)11	244893813	244894046	233	GCCTCATTTCCTTGCAGAAG	GGATGAAGCCGACAGAAGAG
6D	83	SSR83	(GT)7(G)15	244915702	244915824	122	GGAACCTAGGAACCGGTGTA	AGGACCAGCCTAAGAACGTC
6D	84	SSR84	(ATC)6	244938658	244938851	193	CCATCAACACCGTCATCAAG	TCCAATGGTTCCACTCACAA
6D	85	SSR85	(TCG)5	244945998	244946260	262	AAGGACCACCCAACACCATA	CTCATGGACATCGACGACTC
6D	86	SSR86	(GGC)5	244946106	244946384	278	TCGAAGGTGTTGAAGAAGCC	CCAAAACCCTAGCCGCTACT
6D	87	SSR87	(GGC)7	244952613	244952783	170	CTCGTCTTCCTCTTCCATGC	AGTGTCACCCCAAACTCCAG
6D	89	SSR89	(AT)7	244979095	244979225	130	CACCTGGACCTGATGGATTT	CCCGTGTTTATGCTCTCCAT
6D	92	SSR92	(GAT)5	245055873	245056024	151	ATTGTTACAGCGGGATGGAG	GACAGATTTCTGCCAGGGAA
6D	94	SSR94	(GAT)7	245095389	245095556	167	ATTGTTACAGCGGGATGGAG	CTCTCCGGCAGACAGATTTC
6D	95	SSR95	(GAA)5	245104400	245104641	241	AGTAAAAGCCTCGAGCGTCA	ACCTCAATAGTGGCCGTGTC
6D	96	SSR96	(AT)7	245120896	245121135	239	TCTAGGTGCCCATACGATCC	CCCGTGGAGTACTTCAACCA
6D	98	SSR98	(TCT)5	245122105	245122358	253	TCCTCCTCTTCCTCCTCCTC	TGTGCGCCACAGATACAAAT
6D	99	SSR99	(GAT)6	245138284	245138387	103	TGTTACAGCGGTACGGAGTG	TTGGAAAATTTTGGGATGTGA
6D	100	SSR100	(GTG)5	245165084	245165297	213	ATCCCTACCATCCCCATAGC	GGGTTCGACATTTTTCCAGA
6D	101	SSR101	(ATC)6	245169245	245169398	153	CCATCAACACCATCGTCAAG	TCCAATGGTTCCACTCACAA
6D	102	SSR102	(GA)6	245175992	245176160	168	TACGGAACCCTAACACCAGG	GAAGCCTAGCTTGACGATGG
6D	105	SSR105	(CAT)5	245187744	245187972	228	CAAGCAAAGGTTTAGCCAGG	TTCTCTTCGCAGGCAAAAAT
6D	106	SSR106	(GA)6	245202696	245202922	226	AGGAGAGGGAGGCGATTTAG	AGAAAATGTTTCGCACCCAC
6D	109	SSR109	(TC)6	245259014	245259239	225	AGCTTCCACGAAAATGATGG	ACTGAAGATGCCCACCAAAG
6D	110	SSR110	(CT)11	245313668	245313768	100	GAGGCCTTTTCTTCTCTCCC	ACGCAAACCAAGGACAAATC
6D	114	SSR114	(AG)10	245353147	245353378	231	AGATCCACAAAGGATGGGTG	AACAGTTCAGTGTGGAGGGG
6D	116	SSR116	(ATC)6	245376240	245376407	167	TGCATGCATGAGTGATATGC	ACCATTGCCAAGAAGAATGC
6D	117	SSR117	(TGT)7	245394044	245394320	276	CCTACCGCACTCGAATCCTA	GGCCCACAAGTATAGGGGAT
6D	118	SSR118	(AG)11	245398666	245398943	277	TGCTGCTACCTTGGACATTG	CTGATAGTGCCCGTGGAAGT
6D	119	SSR119	(GTAGTG)7gtagcggta(GTG)6	245413840	245414075	235	TGTAACCGTTTAAAATATGAACCA	TACCGCTACTGCTACCACCC
6D	120	SSR120	(AGC)6	245414179	245414450	271	TAGTAGGGGTGGTAGCGGTG	GCATCGCTACAAGGTGTTGA
6D	122	SSR122	(ATC)5	245424220	245424415	195	AGATCATCGCCATCAACACA	TCCAATGGTTCCACTCACAA
6D	123	SSR123	(ATC)6	245437511	245437649	138	GGAAATCCCTTCCCAGAGAG	ATTGTTACAGCGGGATGGAG
6D	124	SSR124	(AAC)5	245448492	245448771	279	ATGGTTAGATCATTTGGGCG	CCATATAAATAGGGCGCTGC
